# Supplementary material
Source: ML conference proceedings conference paper supplement (https://openreview.net/forum?id=qI64pCXNXn)
Supplement: supplementary_material [file visualization.pdf › supp/static/images/visualization.pdf]

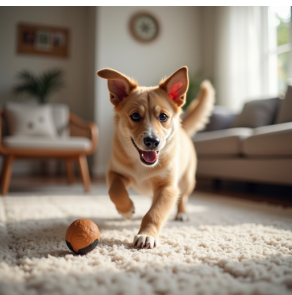

Original

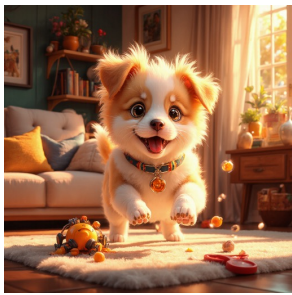

Optimized with HPS score

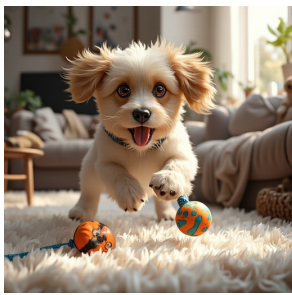

Optimized with HPS score  
and CLIP score

Prompt: A dog with soft fur and bright eyes jumping after a toy, in a cozy living room

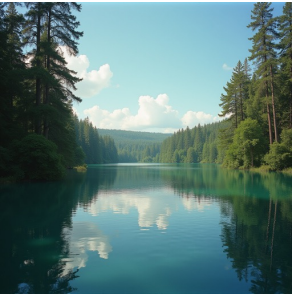

Original

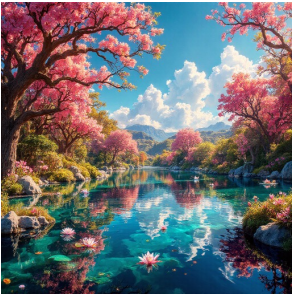

Optimized with HPS score

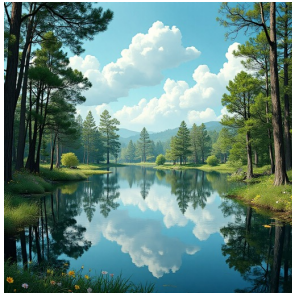

Optimized with HPS score  
and CLIP score

Prompt: The lake surface mirrors the sky, surrounded by tall, lush trees, in the style of James Bidgood

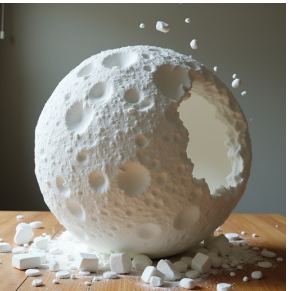

Original

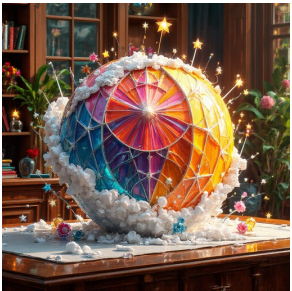

Optimized with HPS score

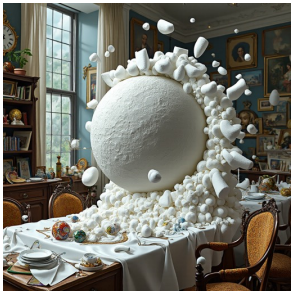

Optimized with HPS score  
and CLIP score

Prompt: The large ball crashed right through the table because it was made of styrofoam

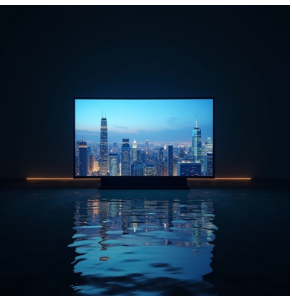

Original

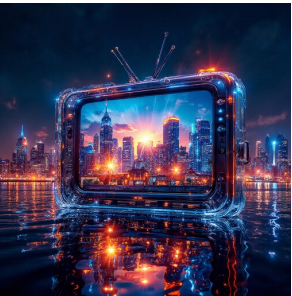

Optimized with HPS score

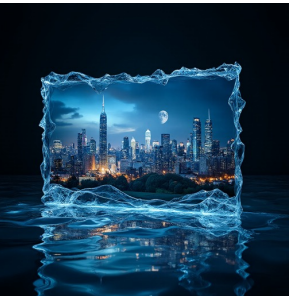

Optimized with HPS score  
and CLIP score

Prompt: A television made of water that displays an image of a cityscape at night
